# Supplementary material
Source: PubMed Central journal article supplement (PMC4610409)
Supplement: NIHMS702475-supplement-erl064016_suppdata_pdf.pdf [file NIHMS702475-supplement-erl064016_suppdata_pdf.pdf]

Supplemental File for “Winter Season Mortality: Will Climate Warming Bring Benefits?”

| City                   | Mean Annual T°C | Winter T°C | Difference Between Summer and Winter T°C | Winter Season Excess Mortality |
|------------------------|-----------------|------------|------------------------------------------|--------------------------------|
| <b>French Cities</b>   |                 |            |                                          |                                |
| Lyon                   | 12.49           | 4.16       | 16.93                                    | 1.13                           |
| Paris                  | 12.44           | 5.41       | 14.32                                    | 1.17                           |
| Marseille              | 15.50           | 7.80       | 15.87                                    | 1.19                           |
| <b>American Cities</b> |                 |            |                                          |                                |
| Atlanta                | 17.13           | 7.74       | 18.35                                    | 1.16                           |
| Boston                 | 10.87           | 0.12       | 21.62                                    | 1.18                           |
| Chicago                | 10.87           | 0.12       | 21.62                                    | 1.13                           |
| Cleveland              | 10.42           | -1.07      | 22.66                                    | 1.14                           |
| Washington, DC         | 14.50           | 3.59       | 21.75                                    | 1.15                           |
| Denver                 | 10.42           | -1.07      | 22.66                                    | 1.16                           |
| Hartford               | 10.27           | -1.53      | 23.34                                    | 1.18                           |
| Houston                | 20.83           | 12.51      | 15.96                                    | 1.11                           |
| Jacksonville           | 20.41           | 12.93      | 14.48                                    | 1.15                           |
| Jersey                 | 13.05           | 1.71       | 22.63                                    | 1.18                           |
| Las Vegas              | 20.28           | 9.38       | 22.35                                    | 1.15                           |
| Los Angeles            | 17.34           | 14.18      | 6.13                                     | 1.18                           |
| Madison                | 8.27            | -5.15      | 25.97                                    | 1.14                           |
| Memphis                | 17.23           | 6.58       | 20.74                                    | 1.13                           |
| Miami                  | 25.03           | 20.87      | 7.68                                     | 1.08                           |
| Middlesex              | 11.65           | 0.57       | 22.14                                    | 1.18                           |
| Milwaukee              | 9.07            | -3.39      | 24.50                                    | 1.15                           |
| Nassau                 | 11.37           | 0.82       | 21.35                                    | 1.15                           |
| Newark                 | 13.05           | 1.71       | 22.63                                    | 1.16                           |
| New Haven              | 10.27           | -1.53      | 23.34                                    | 1.17                           |
| Oakland                | 15.31           | 11.54      | 6.50                                     | 1.18                           |
| Orlando                | 22.74           | 16.83      | 11.10                                    | 1.14                           |
| Philadelphia           | 13.31           | 2.06       | 22.41                                    | 1.18                           |
| Portland               | 10.92           | -0.35      | 22.18                                    | 1.17                           |
| Providence             | 10.85           | 0.00       | 21.77                                    | 1.19                           |
| Sacramento             | 10.85           | 0.00       | 21.77                                    | 1.19                           |
| Salt Lake              | 10.85           | 0.00       | 21.77                                    | 1.19                           |
| San Diego              | 17.66           | 14.15      | 6.65                                     | 1.17                           |
| San Francisco          | 14.54           | 10.73      | 6.74                                     | 1.17                           |
| San Jose               | 16.28           | 10.93      | 10.24                                    | 1.17                           |
| Seattle                | 11.41           | 5.49       | 12.41                                    | 1.13                           |
| Spokane                | 8.71            | -1.35      | 20.56                                    | 1.11                           |
| St. Louis              | 13.98           | 1.65       | 23.95                                    | 1.18                           |
| Tacoma                 | 11.88           | 5.79       | 12.45                                    | 1.16                           |
| New York               | 13.24           | 2.26       | 21.97                                    | 1.14                           |
| Pittsburgh             | 10.92           | -0.35      | 22.18                                    | 1.17                           |

Supplemental Table 1. Temperature and mortality data for the cities included in the analysis. French cities include data from 1971 to 2007, American cities include data from 1985 to 2006. Mean annual temperature calculated using the monthly means across all years. Mean winter and summer temperature calculated using December, January, and February temperatures and June, July and August temperatures, respectively. Winter

season excess mortality calculated as a ratio of December, January, and February deaths to June, July and August deaths.

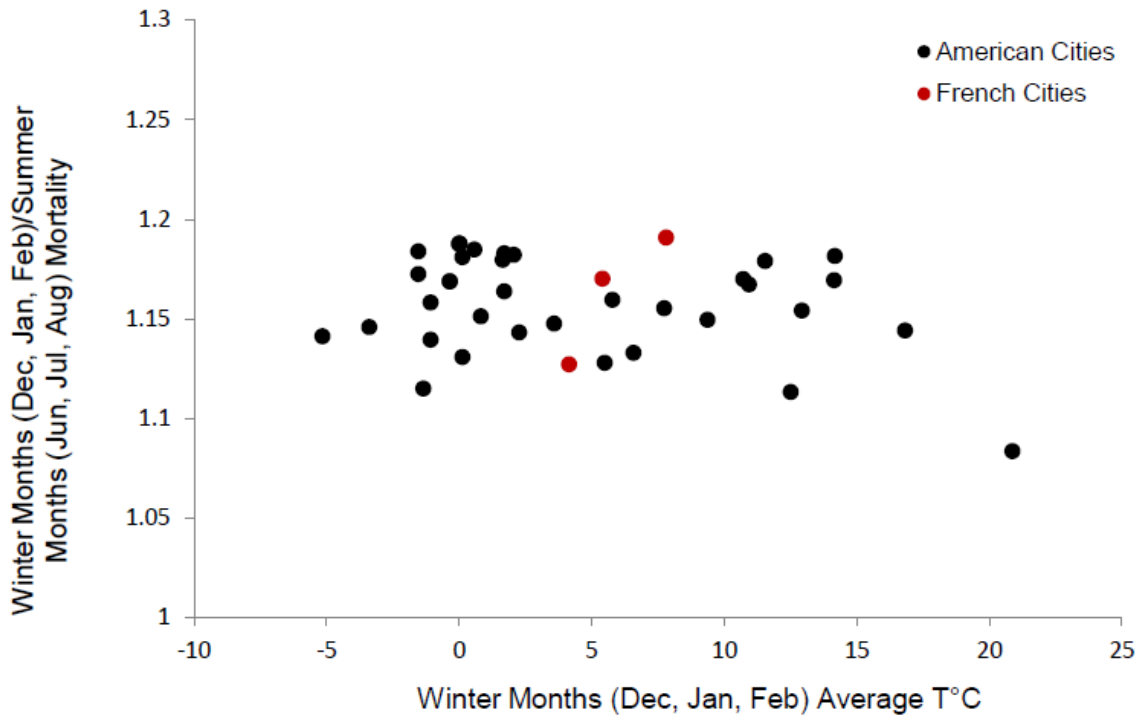

Supplemental Figure 1. Scatter plot of winter excess mortality (the ratio of Dec, Jan, and Feb deaths to Jun, Jul, Aug deaths) vs. winter season mean temperature over 22 years in 35 cities. See supplemental file, Table 1 for a list of cities and input data.

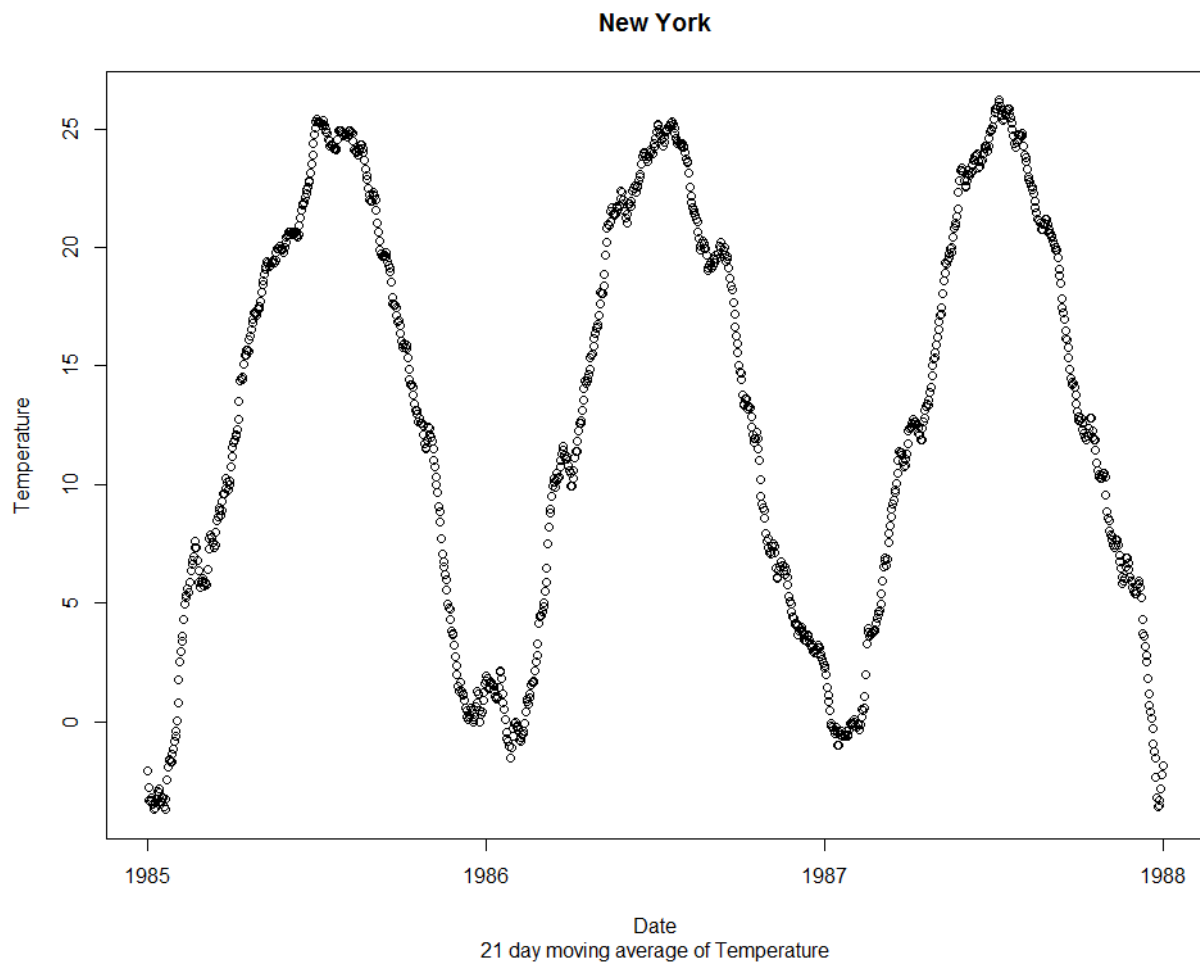

Supplemental Figure 2. 21 day moving average plot for three years in NY.

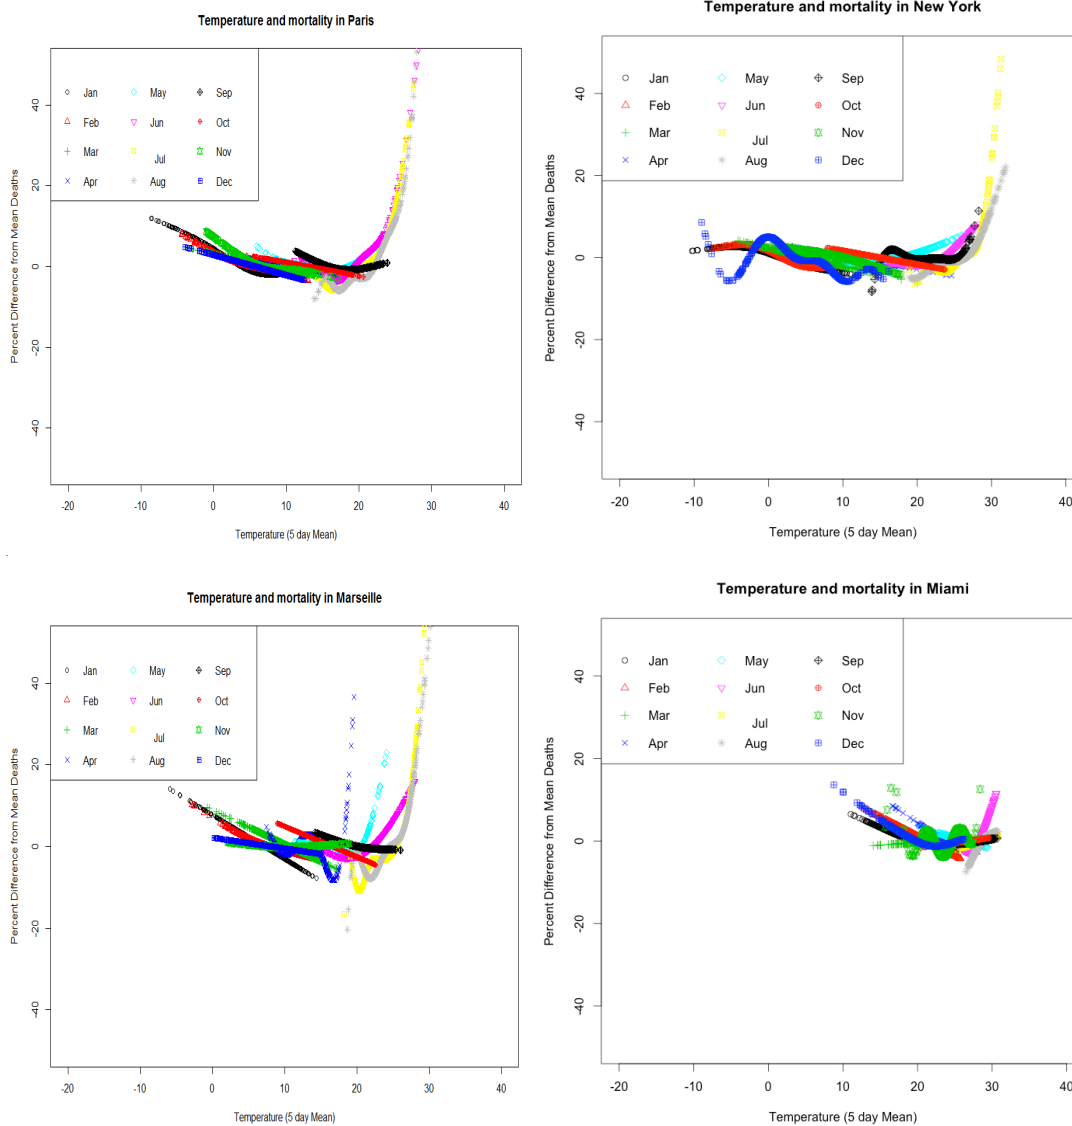

Supplemental Figure 3. Penalized spline functions relating mortality with mean temperature on the five days ending on the day of death by calendar month in Paris and Marseille (left) and New York City and Miami (right). The Paris and Marseille data are for 1971 to 2007 and the NYC and Miami data are for 1985 to 2006.
